# Supplementary material for: Efficient Preparation of Enantiopure D-Phenylalanine through Asymmetric Resolution Using Immobilized Phenylalanine Ammonia-Lyase from Rhodotorula glutinis JN-1 in a Recirculating Packed-Bed Reactor
Source: PLoS One. 2014 Sep 30;9(9):e108586. doi: 10.1371/journal.pone.0108586 (PMC4182499; doi:10.1371/journal.pone.0108586)
Supplement: Supporting Information S1 — Equations used in this study. (DOCX) [file pone.0108586.s001.docx]

**Supplementary material**

**Efficient preparation of enantiopure D-phenylalanine through asymmetric resolution using immobilized phenylalanine ammonia-lyase from *Rhodotorula glutini* JN-1 in a recirculating packed-bed reactor**

Longbao Zhu a,b,*, Li Zhou a,*, Nan Huang a, Wenjing Cui a, Zhongmei Liu a, Ke Xiao a, Zhemin Zhou a,¶

a Key Laboratory of Industrial Biotechnology, Ministry of Education, School of Biotechnology, Jiangnan University, Wuxi 214122, Peoples Republic of China.

b School of Biochemical Engineering, Anhui Polytechnic University, 8 Zheshan Road, Wuhu, Anhui 241000, Peoples Republic of China.

* These authors contributed equally to this work.

¶ To whom correspondence should be addressed.

Zhemin Zhou, Tel: +86-510-85325210, Fax: +86-510-85197551,

E-mail: [zhmzhou@jiangnan.edu.cn](mailto:zhmzhou@jiangnan.edu.cn)

**Supporting information S1**

(S1)

(S2)

(S3)

(S4)

(S5)

(S6)

(S7)

(S8)

(S9)

Where, Mpal, in is the total protein content added to the mixture (mg); Mpal, out is the protein content

of the washing solution and supernatant after immobilization (mg); Msupport is the weight of the support (g); Lphe, in is the concentration of L-phenylalanine in the inlet solution (mM); Lphe, out is the oncentration of L-phenylalanine in the outlet solution (mM); Dphe, out is the concentration of D-phenylalanine in the outlet solution (mM); h is the time when the *ee*D exceeds 99 %; F is the flow rate (mL/min) of the substrate, V is the reactor volume (mL).

**Supplementary figure legends**

**Figure S1. Schematic illustration of the covalent methods of immobilized *Rg*PAL on an MCM-41 support.**

The amino group was grafted onto MCM-41 to generate MCM-41-NH2, and then the bifunctional glutardealdehyde (GA) was used to cross link the enzyme and MCM-41-NH2 to generate MCM-41-NH-GA-*Rg*PAL.

**Figure S2. Schematic diagram of the resolution of DL-phenylalanine using immobilized *Rg*PAL in a RPBR.**

The immobilized *Rg*PAL was packed into a RPBR. Substrates were fed from the bottom of the column using a controlled peristaltic pump. The solution was recirculated until the reaction nearly reached completion. The products were collected in a separate tank. Samples of the input and output were collected and analyzed by HPLC.
